# Supplementary material for: Patterns in first and daily cigarette initiation among youth and young adults from 2002 to 2015
Source: PubMed Central journal article supplement (PMC6086419; doi:10.1371/journal.pone.0200827), 2018-08-10

**S1 Fig. Model-based trends in the annual incidence of cigarette initiation (%), by age, gender, and race/ethnicity (source: 2002-2015 NSDUH)**

**A. Model-based trends in the annual incidence (%) of cigarette initiation, by age, white males aged 12-25 years (source: 2002-2015 NSDUH)**

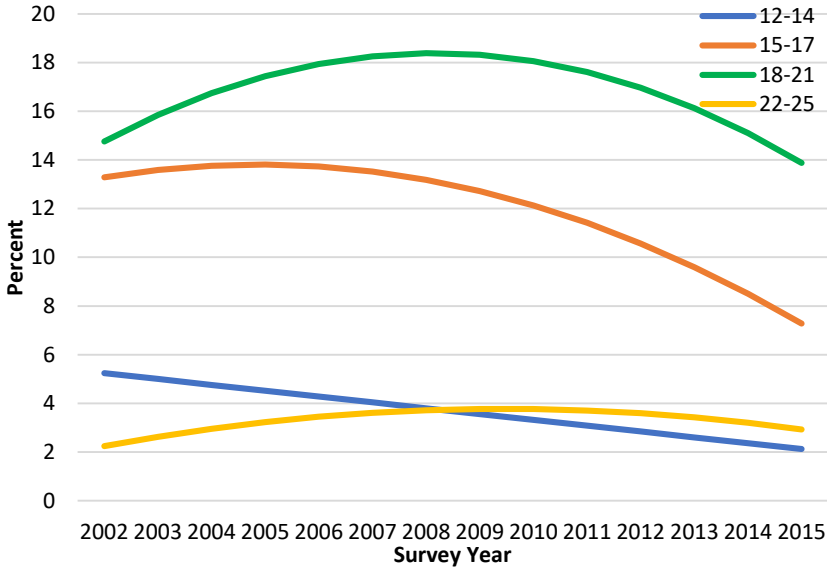

**B. Model-based trends in the annual incidence of cigarette initiation (%), by age, African American males aged 12-25 years (source: 2002-2015 NSDUH)**

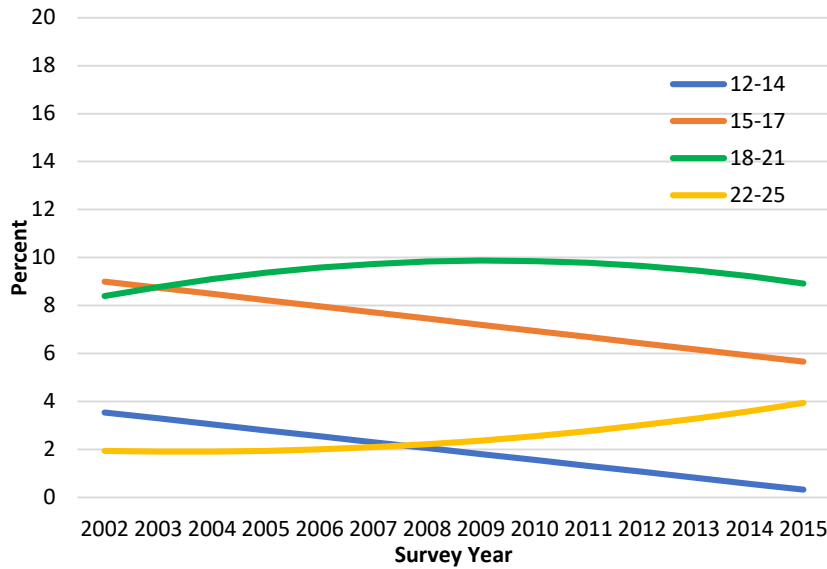

**C. Model-based trends in the annual incidence of cigarette initiation (%), by age, Hispanic males aged 12-25 years (source: 2002-2015 NSDUH)**

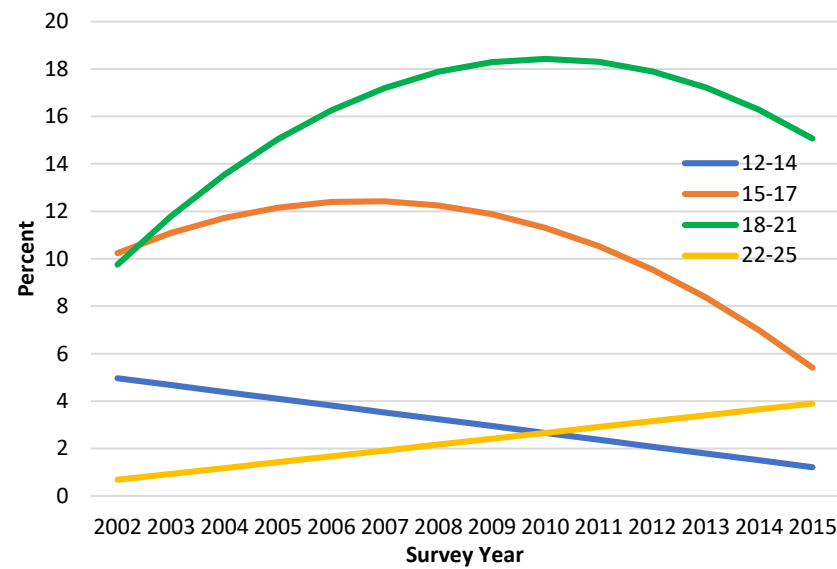

**D. Model-based trends in the annual incidence of cigarette initiation (%), by age, white females aged 22-25 years (source: 2002-2015 NSDUH)**

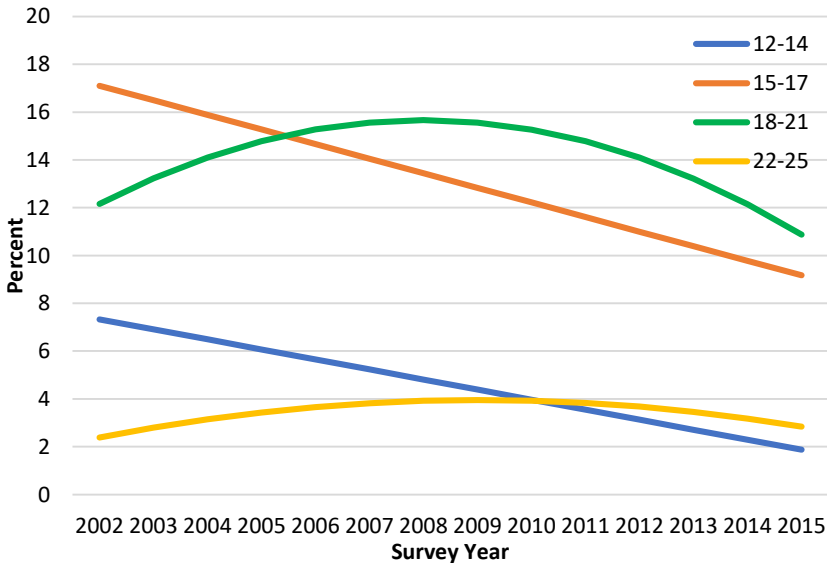

**E. Model-based trends in the annual incidence of cigarette initiation (%), by age, African American females aged 22-25 years (source: 2002-2015 NSDUH)**

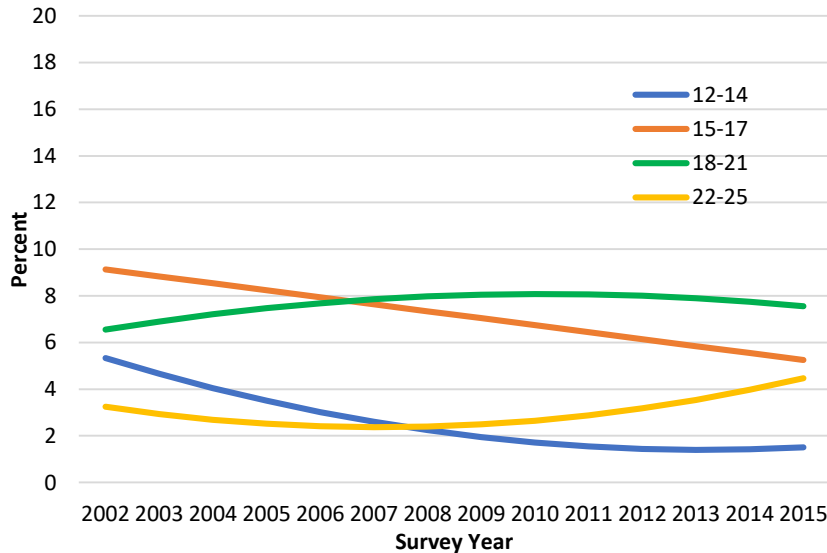

**F. Model-based trends in the annual incidence of cigarette initiation (%), by age, Hispanic females aged 12-25 years (source: 2002-2015 NSDUH)**

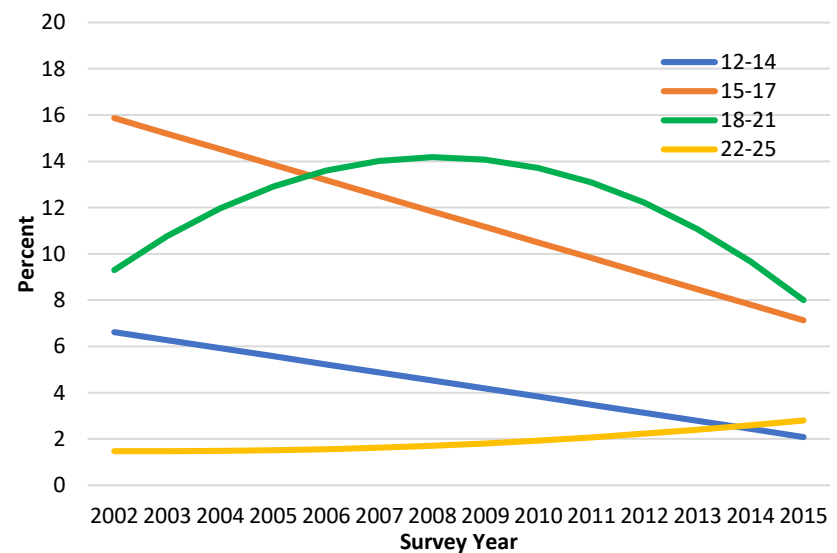

Supplement: pone.0200827.s001.pdf [file pone.0200827.s001.pdf]
