# Supplementary material for: Patterns in first and daily cigarette initiation among youth and young adults from 2002 to 2015
Source: PubMed Central journal article supplement (PMC6086419; doi:10.1371/journal.pone.0200827), 2018-08-10

**S3 Fig. Raw annual cigarette initiation rates (%) and confidence intervals, by age, males and females aged 12-25 years (source: 2002-2015 NSDUH)**

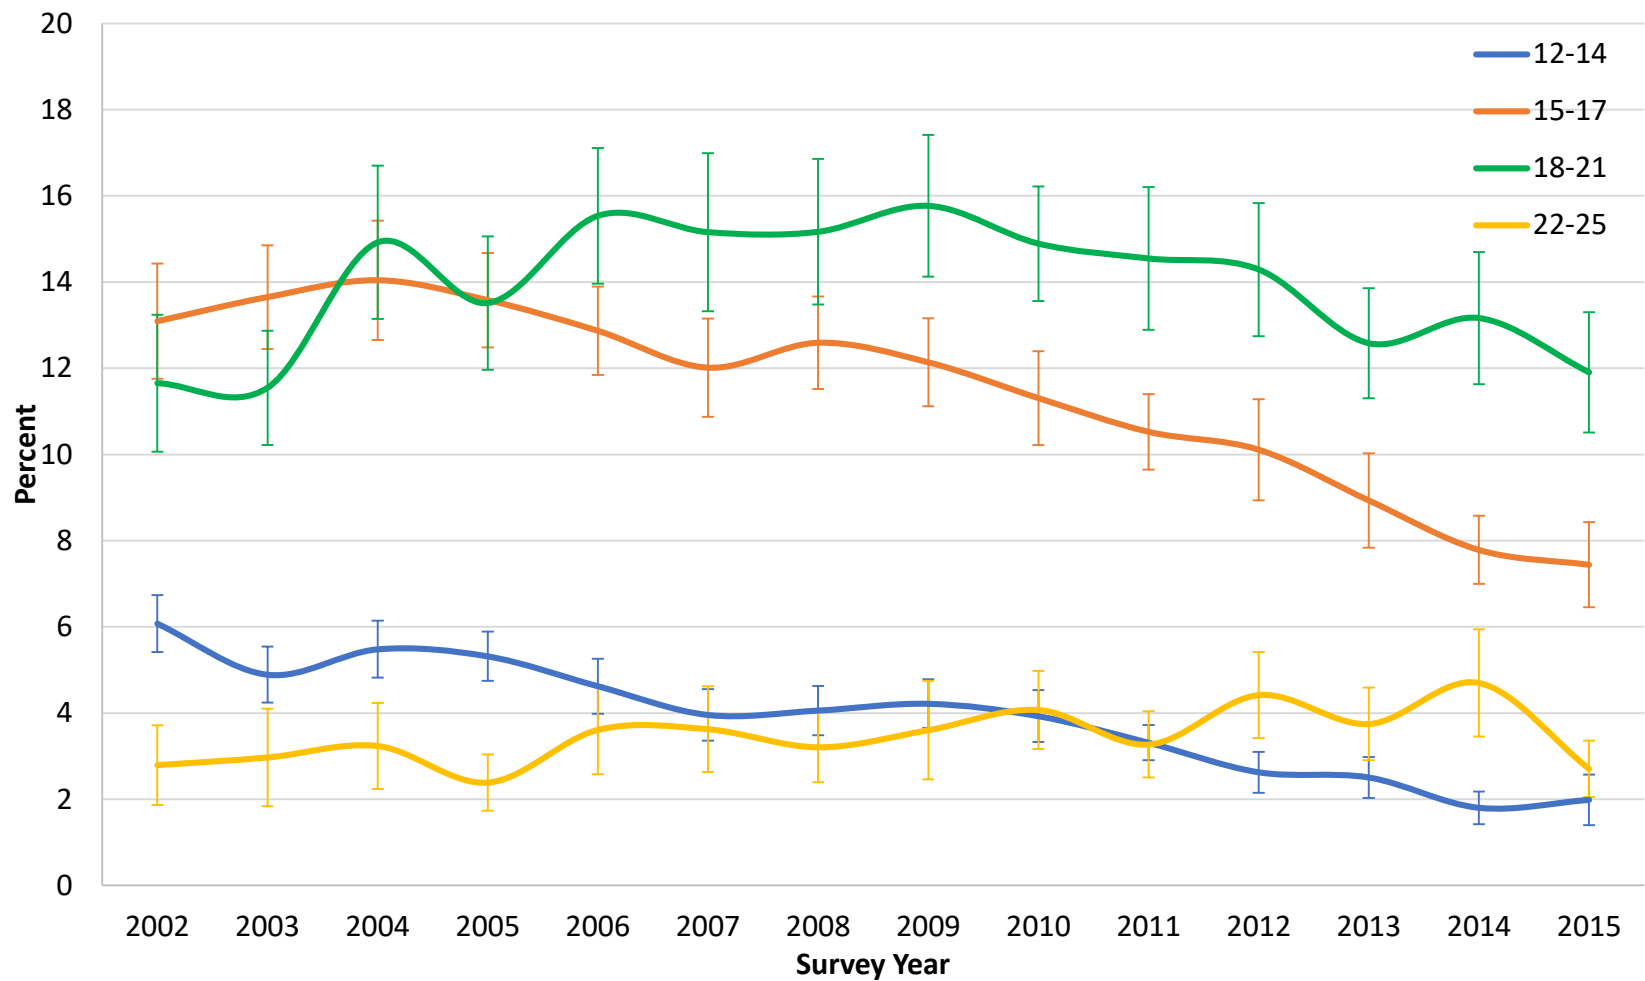

Supplement: pone.0200827.s003.pdf [file pone.0200827.s003.pdf]
