# Supplementary material for: Patterns in first and daily cigarette initiation among youth and young adults from 2002 to 2015
Source: PubMed Central journal article supplement (PMC6086419; doi:10.1371/journal.pone.0200827), 2018-08-10
Supplement: pone.0200827.s009.pdf [file pone.0200827.s009.pdf]

**S1 Table. Autoregressive models of cigarette initiation and daily initiation among age, gender and racial/ethnic groups (source: 2002-2015 NSDUH).**

|                               |         |       | Cigarette Initiation |         | Daily initiation |         |
|-------------------------------|---------|-------|----------------------|---------|------------------|---------|
|                               |         |       | Odds ratio           | P-value | Odds ratio       | P-value |
| Race/ethnicity                | Gender  | Age   |                      |         |                  |         |
| All Three Races               | Overall | 12-14 | 39.61                | <0.01   | 1.03             | 0.56    |
|                               |         | 15-17 | 243.90               | <0.01   | 5.08             | <.01    |
|                               |         | 18-21 | 0.10                 | 0.03    | 1.89             | 0.12    |
|                               |         | 22-25 | 0.41                 | <0.01   | 1.11             | 0.37    |
|                               | Male    | 12-14 | 5.57                 | <0.01   | 1.05             | 0.70    |
|                               |         | 15-17 | 9.66                 | 0.11    | 0.58             | 0.46    |
|                               |         | 18-21 | 0.01                 | <0.01   | 0.49             | 0.35    |
|                               |         | 22-25 | 0.19                 | <0.01   | 1.13             | 0.50    |
|                               | Female  | 12-14 | 43.34                | <0.01   | 0.96             | 0.54    |
|                               |         | 15-17 | 49.18                | <0.01   | 5.07             | <0.01   |
|                               |         | 18-21 | 0.24                 | 0.30    | 1.22             | 0.67    |
|                               |         | 22-25 | 0.47                 | 0.02    | 1.12             | 0.50    |
| Non-Hispanic White            | Overall | 12-14 | 32.45                | <0.01   | 3.05             | <0.01   |
|                               |         | 15-17 | 572.98               | <0.01   | 15.68            | <0.01   |
|                               |         | 18-21 | 0.59                 | 0.77    | 2.66             | 0.24    |
|                               |         | 22-25 | 1.94                 | 0.28    | 1.09             | 0.76    |
| Non-hispanic African American | Overall | 12-14 | 10.77                | 0.11    | 0.88             | 0.23    |
|                               |         | 15-17 | 40.28                | 0.05    | 4.06             | 0.02    |
|                               |         | 18-21 | 0.38                 | 0.72    | 2.06             | 0.54    |
|                               |         | 22-25 | 1.28                 | 0.82    | 2.18             | 0.20    |
| Hispanic                      | Overall | 12-14 | 189.45               | <0.01   | 1.55             | 0.20    |
|                               |         | 15-17 | 162.83               | <0.01   | 13.60            | <0.01   |
|                               |         | 18-21 | 0.61                 | 0.86    | 2.66             | 0.43    |
|                               |         | 22-25 | 0.29                 | 0.18    | 0.85             | 0.53    |
